# Supplementary material
Source: PubMed Central journal article supplement (PMC2683078)
Supplement: 0903397106_0903397106SI.pdf [file 0903397106_0903397106SI.pdf]

# Supporting Information

Voytek and Joyce 10.1073/pnas.0903397106

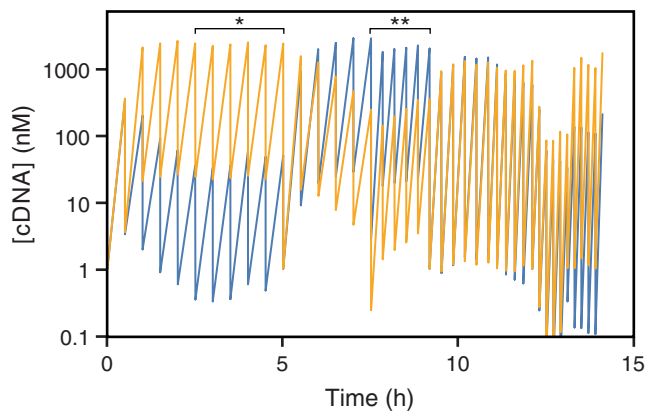

**Fig. S1.** Time course of 40 transfers of continuous coevolution using a single substrate. The concentration of the CL1 (orange) and DSL (blue) enzymes was determined (based on cDNA) before and after each transfer. Single and double asterisks denote periods when anti-CL1 and anti-DSL antisense oligos, respectively, were present in the reaction mixture.

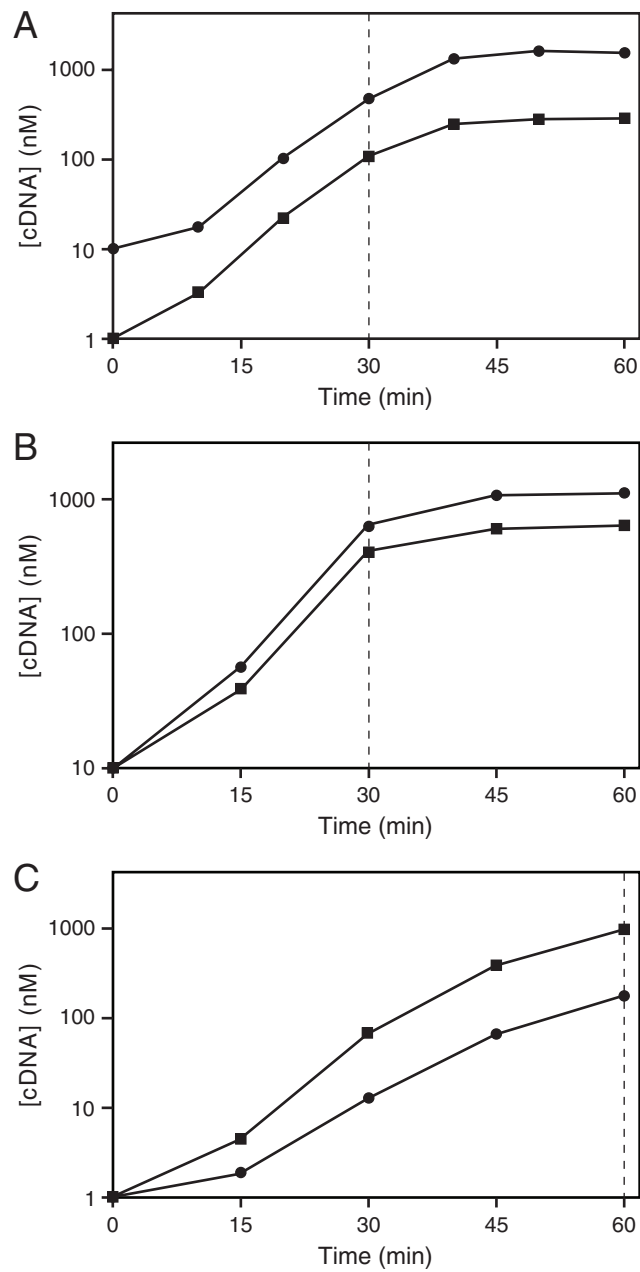

**Fig. S2.** Representative amplification profiles (based on cDNA) of the CL1 (circles) and DSL (squares) enzymes at the initiation of the coevolution experiment employing 5 substrates (A), following transfer 11 (B), and following transfer 25 (C). Dashed lines indicate the time at which dilution for the next transfer was performed.



**Table S1. Substrates and corresponding promoter strengths**

| Substrate | Promoter sequence         | Transcription rate, nM min <sup>-1</sup> | Relative efficiency |
|-----------|---------------------------|------------------------------------------|---------------------|
| S0        | TAATACGACTCACU <b>AUU</b> | 3.8                                      | 1.00                |
| S1        | TAATACGACTCGCU <b>AUU</b> | 0.41                                     | 0.11                |
| S2        | TAATACGACTCACU <b>GUU</b> | 0.34                                     | 0.09                |
| S3        | TAATACGACTCACU <b>ACU</b> | 0.75                                     | 0.20                |
| S4        | TAATACGACTCACU <b>AUC</b> | 2.4                                      | 0.63                |
| S5        | TAATACGACTCACU <b>UUU</b> | 0.89                                     | 0.23                |

Sequence of the 17-nucleotide T7 RNA polymerase promoter region of substrates used in continuous coevolution. The S0 promoter conforms to the  $\phi$ 2.5 consensus sequence (1); alternative promoter sequences were chosen based on Imburgio et al. (2). Nucleotides in bold indicate point mutations relative to S0. Transcription rate was measured in a reaction mixture that mimicked continuous evolution conditions, employing 10 nM RNA/cDNA heteroduplex template corresponding to the CL1 enzyme. Linear regression coefficients from 6 timepoints were in the range of 0.975–0.999.

1. Dunn JJ, Studier FW (1981) Nucleotide sequence from the genetic left end of bacteriophage T7 DNA to the beginning of gene 4. *J Mol Biol* 148:303–330.
2. Imburgio D, Rong M, Ma K, McAllister WT (2000) Studies of promoter recognition and start site selection by T7 RNA polymerase using a comprehensive collection of promoter variants. *Biochemistry* 39:10419–10430.
